# Supplementary material for: Differentiation of multipotent vascular stem cells contributes to vascular diseases
Source: Springer Nature journal article supplement (doi:10.1038/ncomms1867), 2012-06-06
Supplement: 41467_2012_BFncomms1867_MOESM824_ESM.pdf [file 41467_2012_BFncomms1867_MOESM824_ESM.pdf]

**Supplementary Figure S1. Non-SMCs in rat carotid artery.**

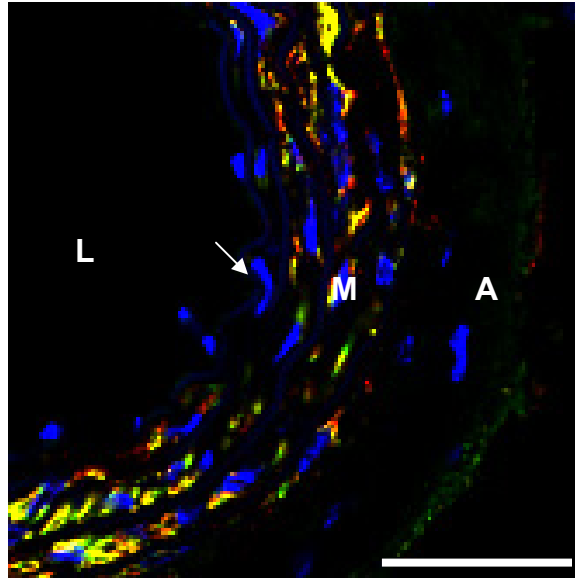

Cross sections of carotid artery were stained for SM-MHC (red) and SMA (Green). Nuclei were stained with DAPI. L: lumen, M: media, A: adventitia. Arrow indicates a SM-MHC-cell inside tunica media. Scale bar is 50  $\mu\text{m}$ .

**Supplementary Figure S2. Non-SMCs proliferated and dominated the culture.**

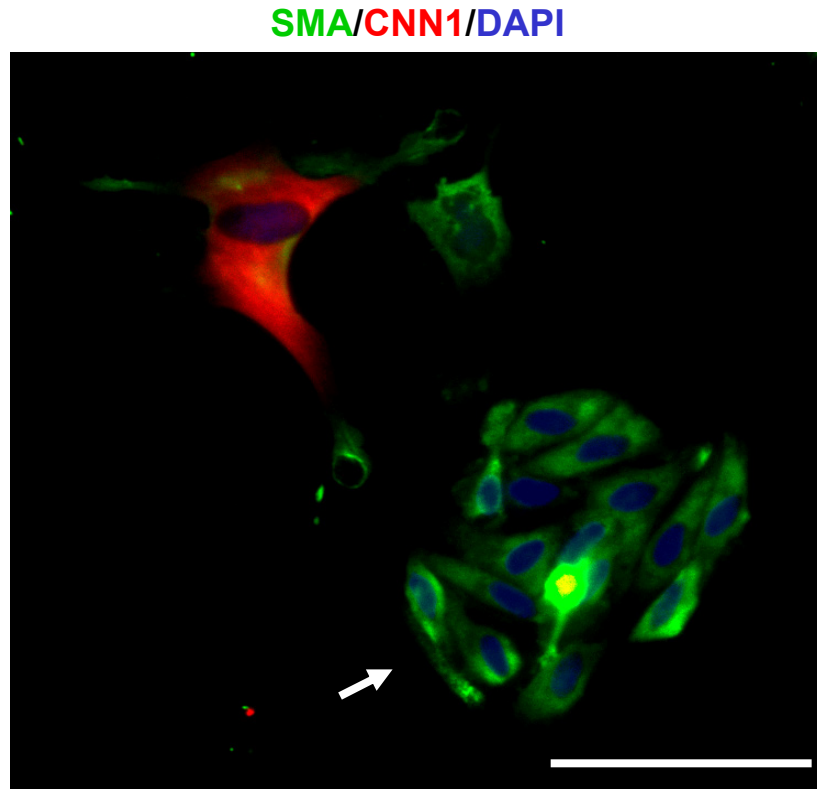

The cells isolated by using enzymatic digestion were cultured for 3 days in DMEM with 10% FBS. Immunostaining for SMA and CNN1 showed that only the SMA<sup>low</sup>/CNN1<sup>-</sup> population could expand and form colonies. Scale bar is 100  $\mu$ m.

Supplementary Figure S3. Increased cell spreading and nuclei projection areas of non-SMCs in culture.

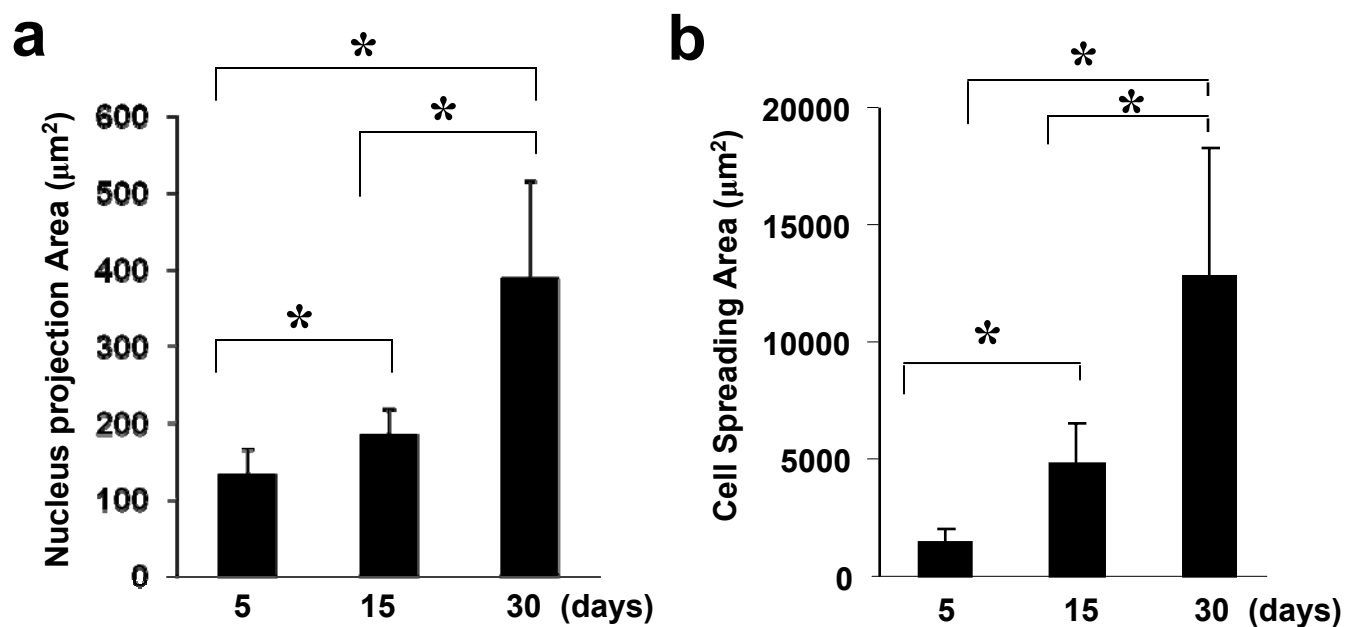

SM-MHC<sup>-</sup> cells were isolated from carotid arteries by using tissue explant culture method and cultured for 5, 15 and 30 days in DMEM with 10% FBS. (a) Increase of nucleus projection area during spontaneous differentiation. (b) Increase of cell spreading area during spontaneous differentiation. Data were shown as average  $\pm$  standard deviation (n=3). Holm's t-test was used to calculate the p values. \* indicates significant difference (p<0.05).

Supplementary Figure S4. *In vivo* differentiation of MVSCs into Schwann Cells.

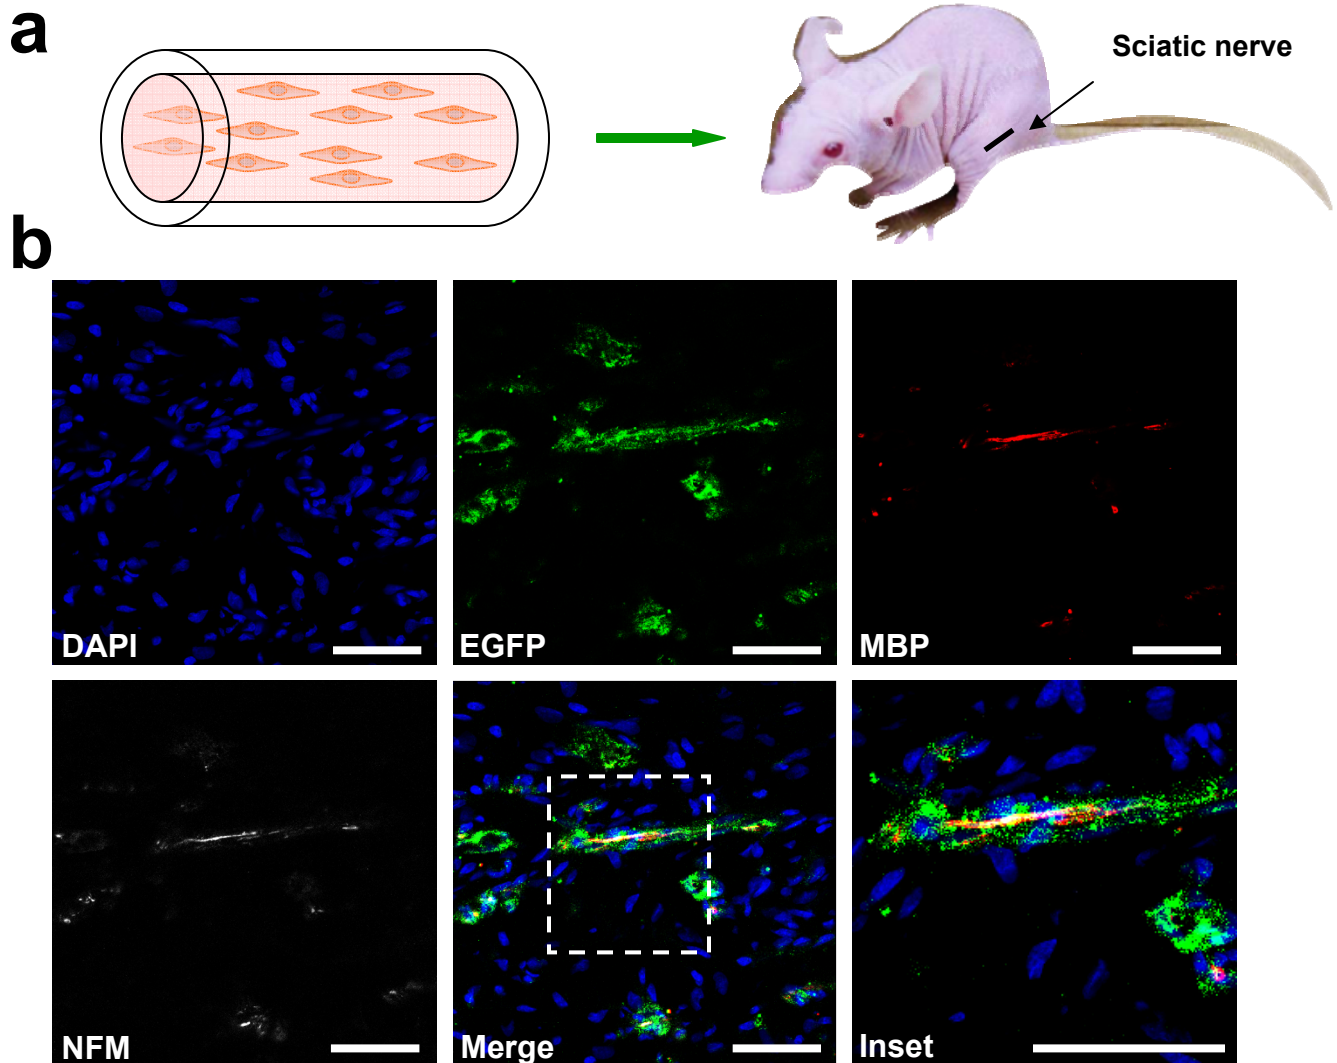

(a) MVSCs isolated from EGFP rats were embedded in matrigel inside the nerve conduit, and the nerve conduit was used to bridge the transected sciatic nerve in an athymic rat. (b) Staining of longitudinal-sections of a nerve conduit at 30 days after transplantation with antibodies against EGFP, MBP and NFM. Nuclei were stained with DAPI. Scale bars are 50  $\mu\text{m}$ .

Supplementary Figure S5. Characterization of MVSCs isolated from different blood vessels of rat.

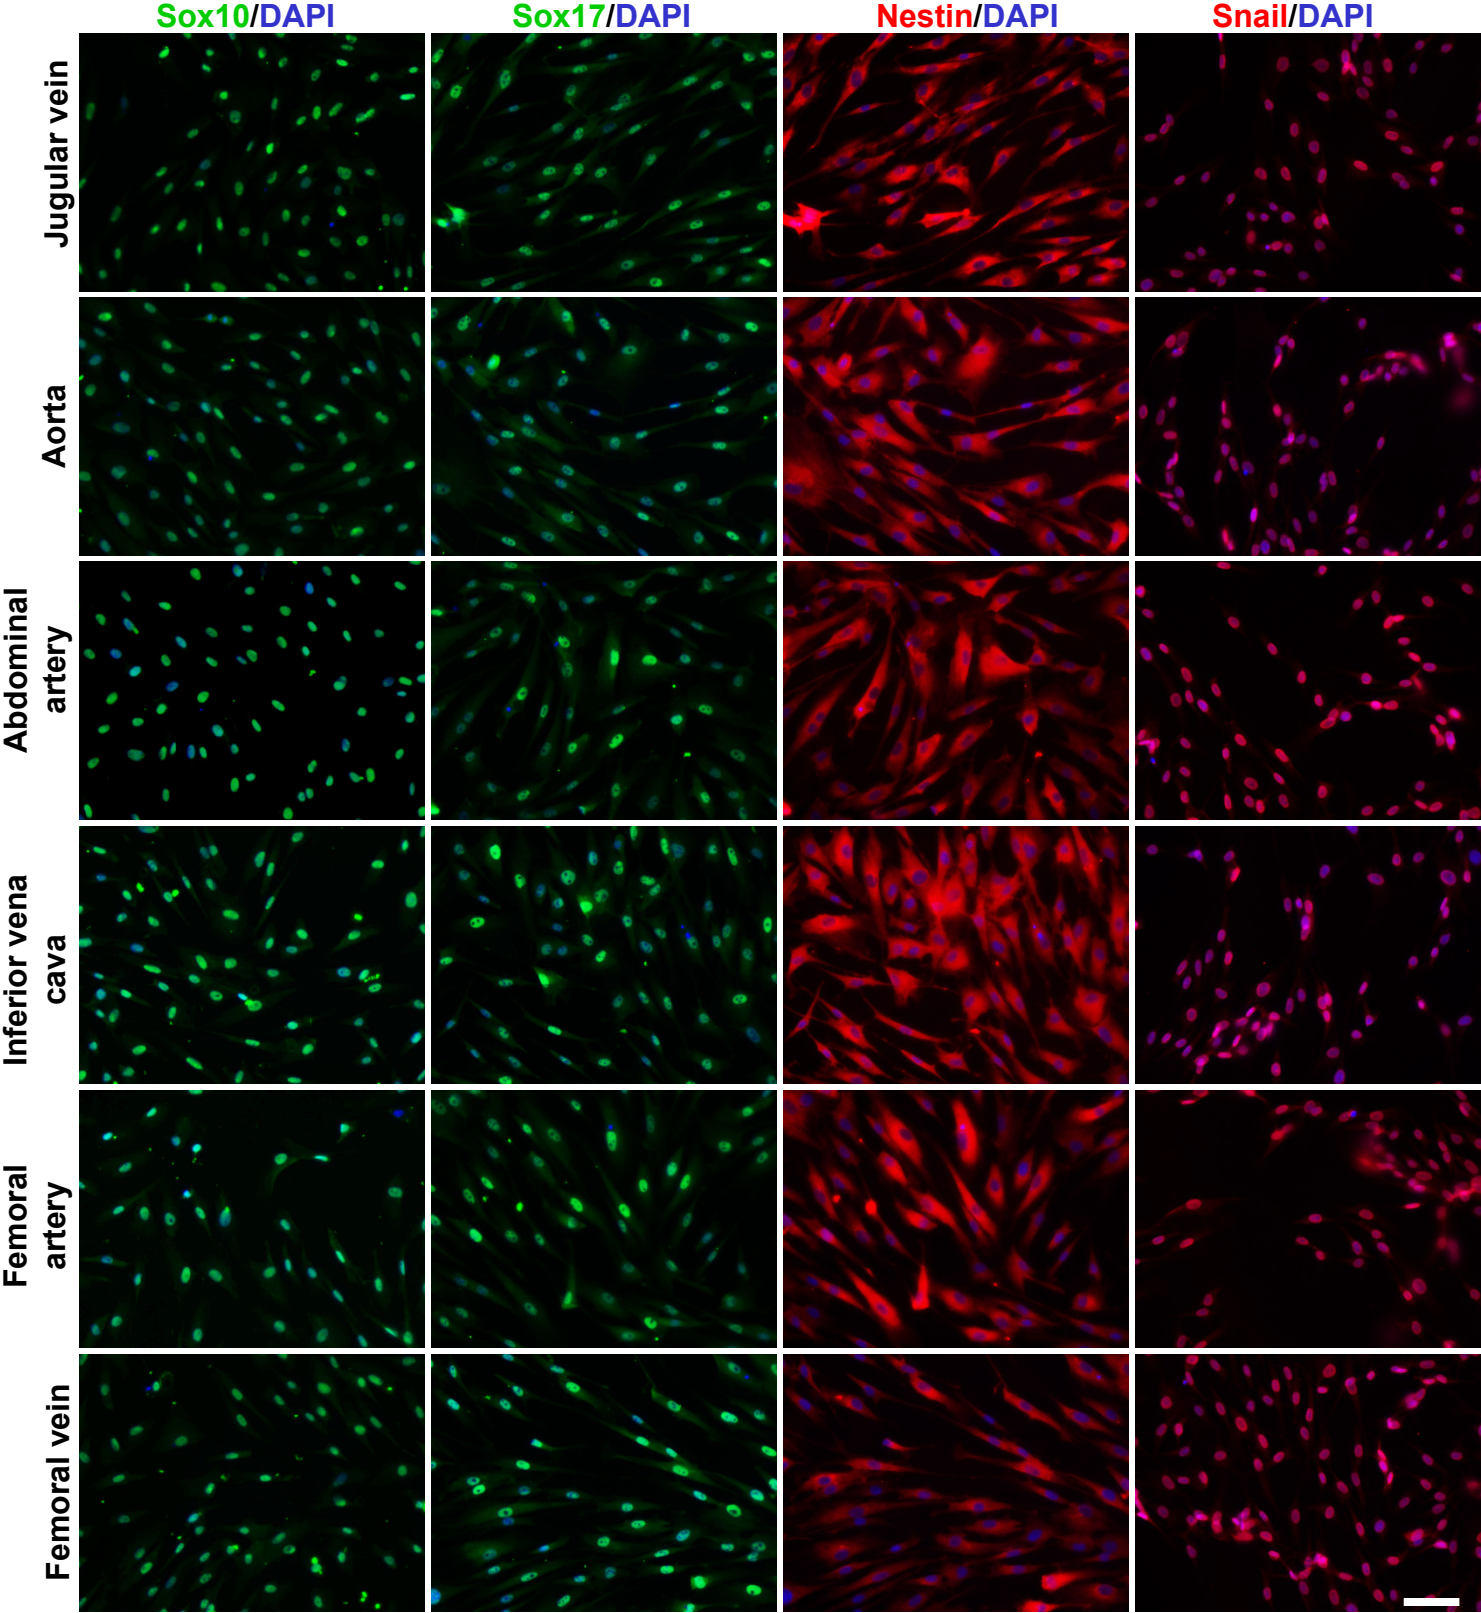

Immunostaining of MVSCs derived from jugular vein, aorta, abdominal artery, inferior vena cava, femoral artery and femoral vein with antibodies against Sox10, Sox17, nestin and snail. Nuclei were stained with DAPI. Scale bar is 100  $\mu$ m.



**Supplementary Figure S6. Characterization of single cell cloned MVSCs.**

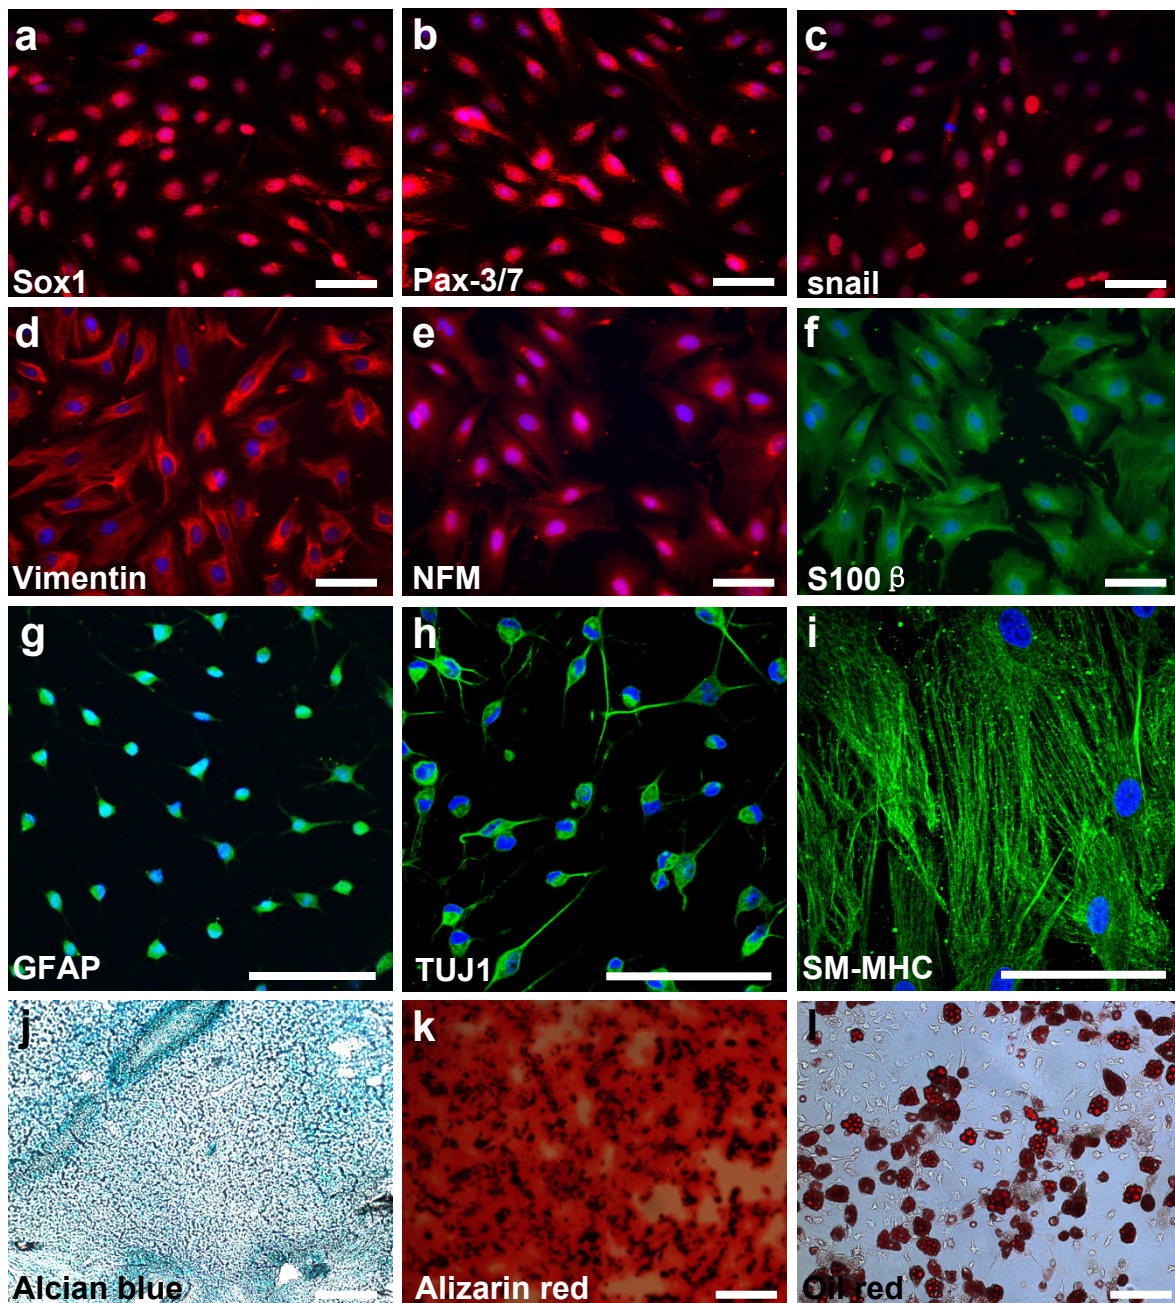

(a-f) Staining of MVSCs derived from single cell cloning with antibodies against Sox1 (a), Pax-3/7 (b), snail (c), vimentin (d), NFM (e) and S100β (f). (g-l) Staining of differentiated cell derived from cloned MVSCs: Schwann cells were stained for GFAP (g), neurons were stained for TUJ1 (h), SMCs were stained for SM-MHC (i), chondrocytes were stained for aggrecan by using alcian blue (j), osteoblasts were stained for calcified matrix by using alizarin red (k), and adipocytes were stained for oil droplets by using oil red (f). Scale bars are 100 μm.

**Supplementary Figure S7. Neural sphere culture of single cell cloned MVSCs.**

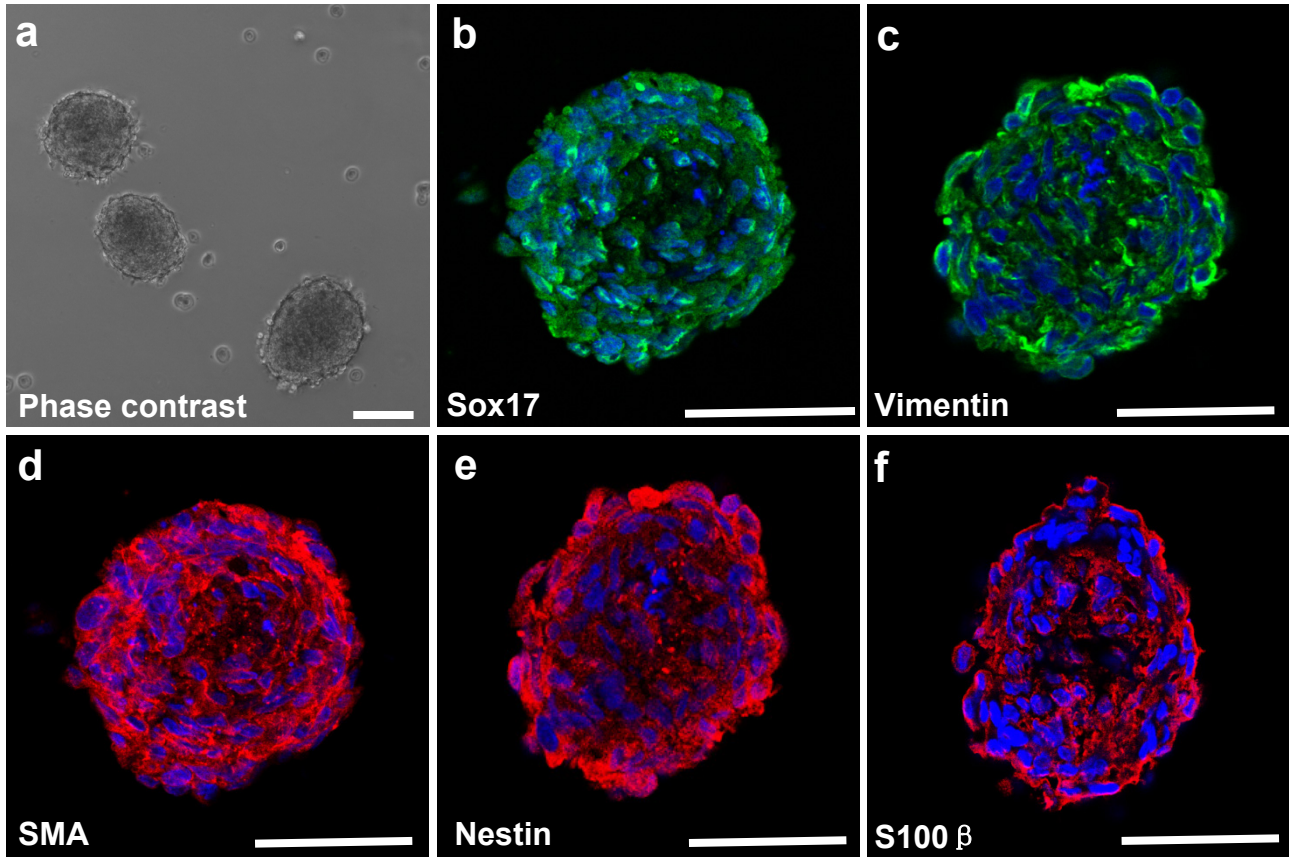

(a) Phase contrast image of neural spheres formed by cloned MVSCs. (b-f) Immunostaining of cross sections of neural spheres derived from MVSCs for MVSC markers including Sox17 (b), vimentin (c), SMA (d), nestin (e) and S100  $\beta$  (f). The nuclei were stained with DAPI. Scale bars are 50  $\mu\text{m}$ .

**Supplementary Figure S8. Non-SMCs in carotid artery of SM-MHC-Cre/LoxP-EGFP mouse.**

**EGFP/ Cre/ DAPI**

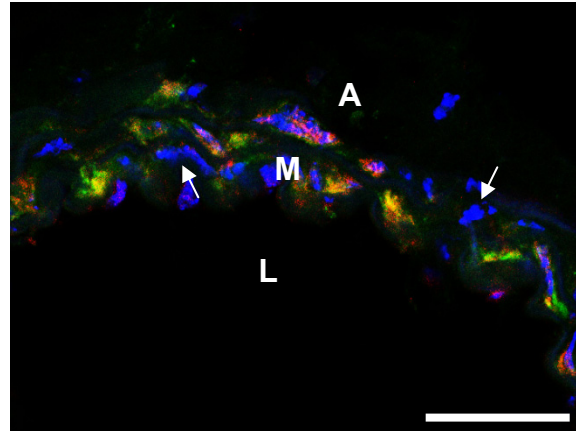

Staining of a cross-section of native carotid artery from a SM-MHC-Cre/LoxP-EGFP mouse with antibodies against EGFP (green) and Cre (red). Arrows indicate non-SMCs in tunica media which do not express GFP or Cre. Nuclei were stained with DAPI. Scale bar is 50  $\mu$ m. L: Lumen. M: media layer. A: Adventitia.



**Supplementary Figure S9. MVSC isolation from lineage tracing mice with  $\beta$ -actin promoter.**

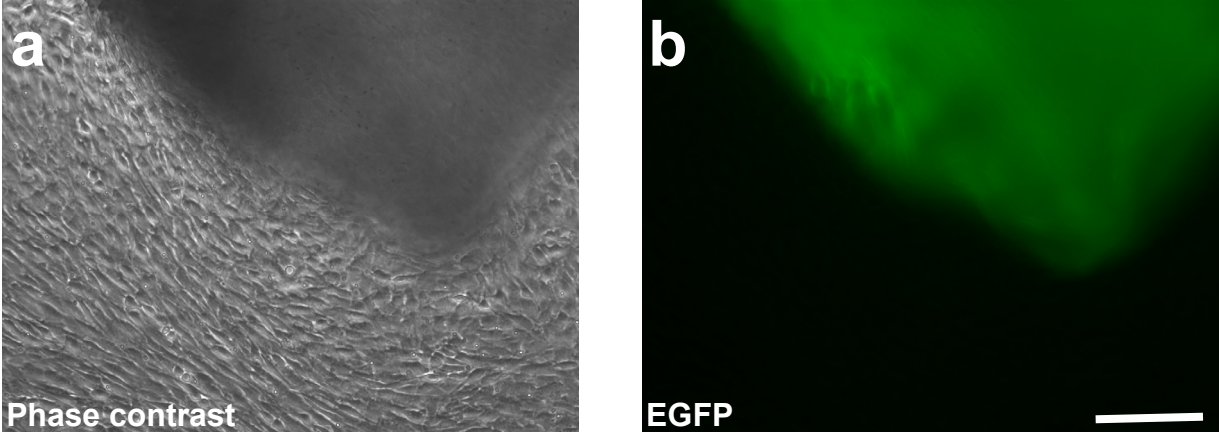

MVSCs were derived from the carotid arteries of SM-MHC-Cre/Actin-LoxP-EGFP mice by using tissue explant culture method. (a) Phase contrast image of MVSCs and the tissue chunk from which the cells migrated from. (b) FITC channel was used to detect the EGFP signal. Scale bar is 100  $\mu$ m.

**Supplementary Figure S10. Characterization of EGFP<sup>+</sup> cells isolated from carotid artery of lineage tracing mouse.**

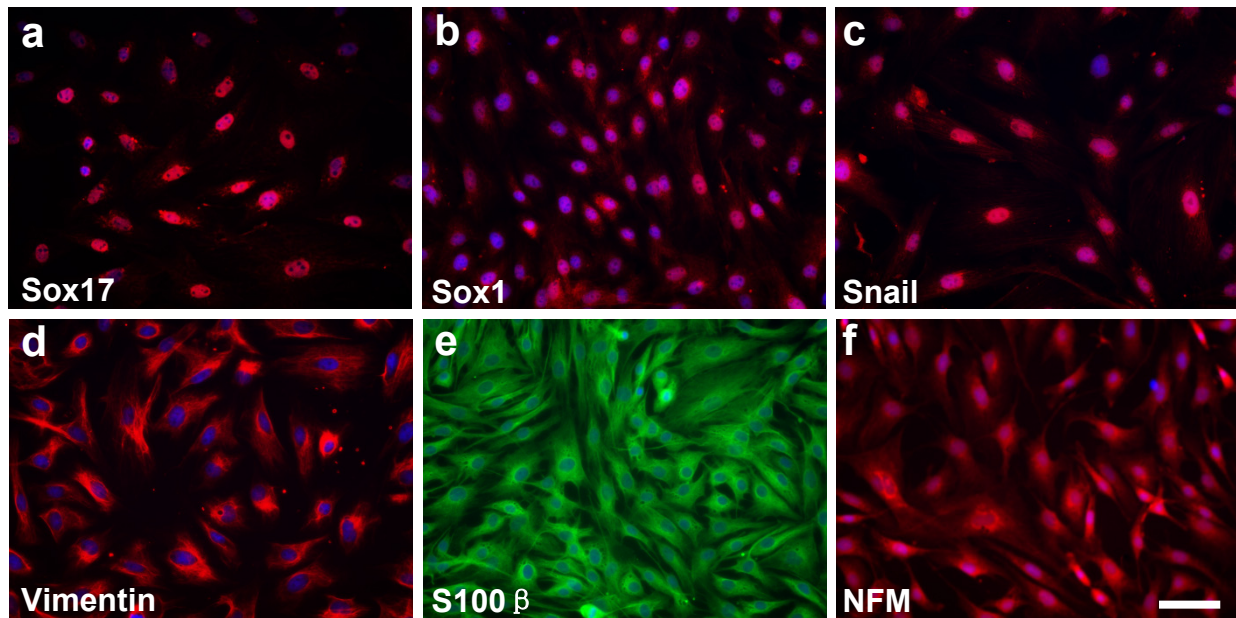

(a-f) Staining of EGFP<sup>+</sup> cells with antibodies against Sox17 (a), Sox1 (b), snail (c), vimentin (d), NFM (e) and S100β (f). Scale bar is 100 μm.

**Supplementary Figure S11. EGFP expression after MVSCs differentiated into SMCs.**

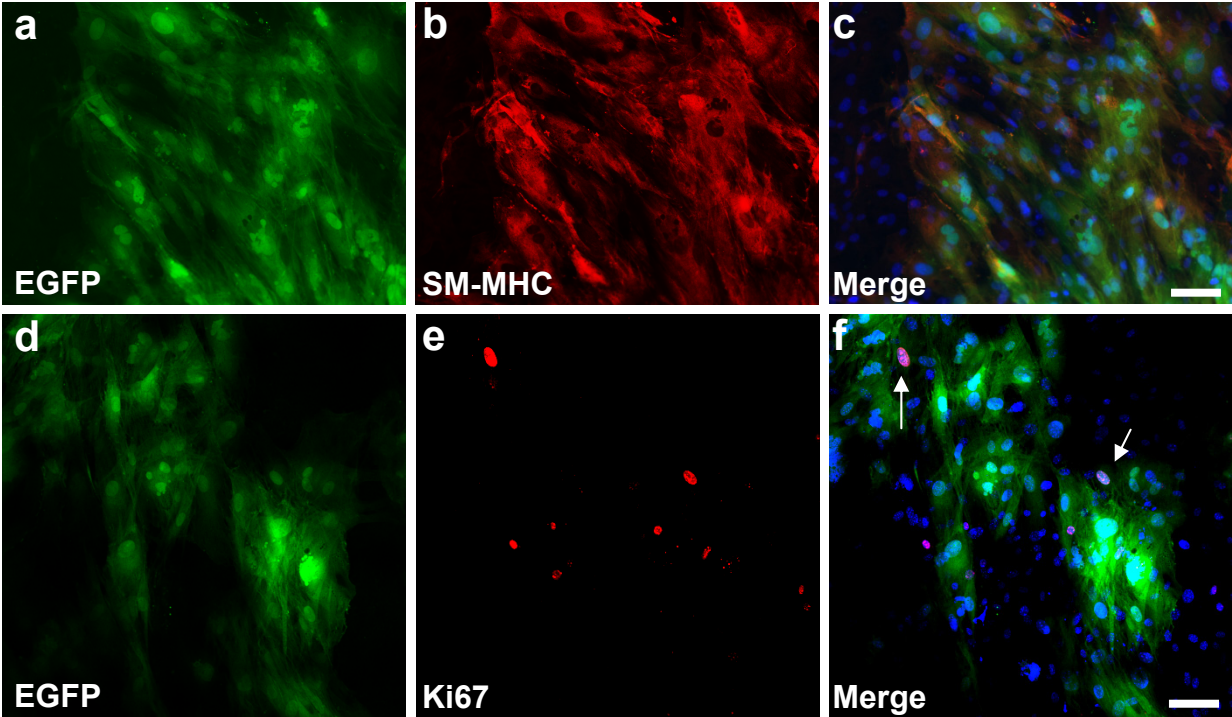

EGFP<sup>-</sup> MVSCs were derived from SM-MHC-Cre/LoxP-EGFP mice, co-cultured with OP9-Delta1 feeder cells for 2 weeks, and became EGFP<sup>+</sup> cells. (a-c) EGFP<sup>+</sup> cells were immunostained with an antibody against SM-MHC. (d-f) EGFP<sup>+</sup> cells were immunostained with an antibody against Ki67. Arrows indicate proliferating EGFP<sup>+</sup> cells. Nuclei were stained with DAPI. Scale bars are 100  $\mu$ m.

**Supplementary Figure S12. *In vivo* differentiation of MVSCs into SMCs.**

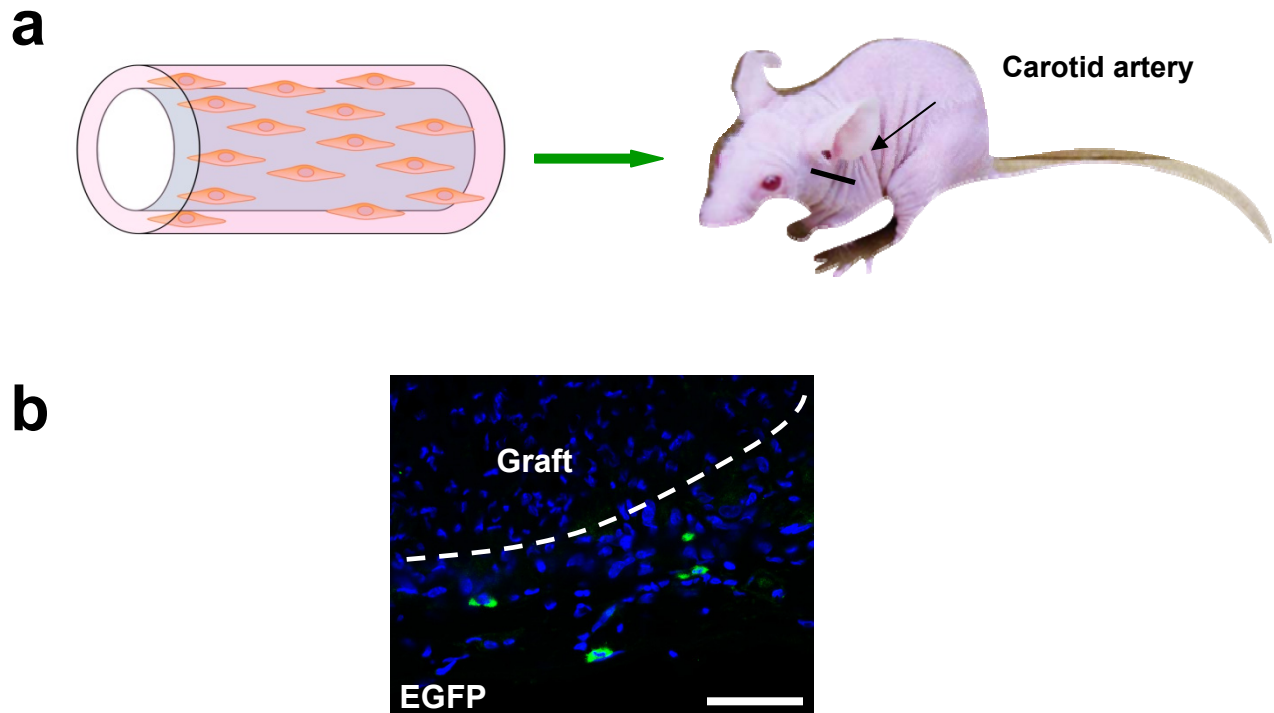

(a) MVSCs derived from SM-MHC-Cre/LoxP-EGFP mice were embedded in collagen gel on the outer surface of a nanofibrous poly(l-lactic acid) vascular graft. The construct was transplanted into an athymic rat by performing carotid artery anastomosis. (b) Staining of cross-sections of a vascular graft with an antibody against EGFP at 1 month after transplantation. Nuclei were stained with DAPI. Scale bar is 50  $\mu$ m. Dashed line indicates the boundary of the graft and collagen gel. EGFP<sup>+</sup> cells indicate the differentiation of MVSCs into SM-MHC expressing SMCs.

Supplementary Figure S13. Expression of MVSC markers in normal and injured carotid arteries of rat.

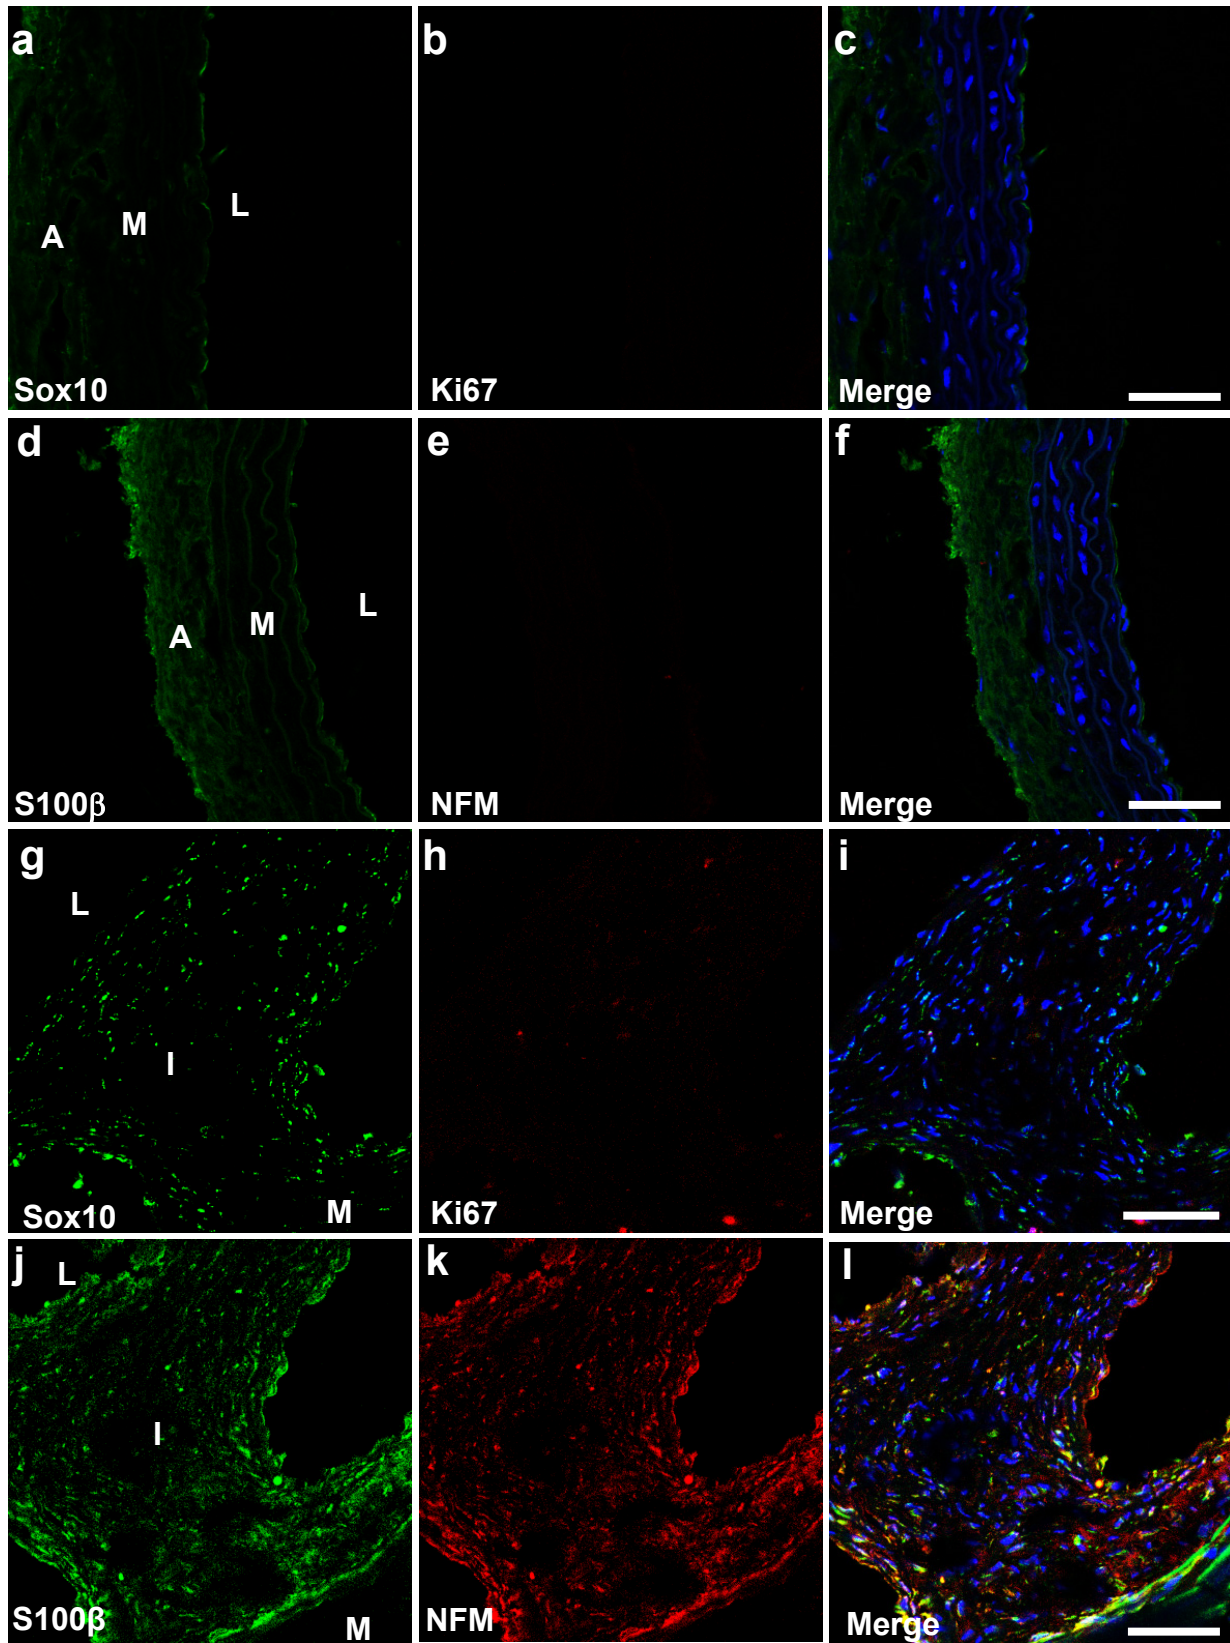

(a-f) Immunostaining of the cross-sections of native carotid artery with antibodies against Sox10, Ki67, S100 $\beta$  and NFM. (g-l) Immunostaining of cross-sections of injured carotid arteries (day 30) with antibodies against Sox10, Ki67, S100 $\beta$  and NFM. Scale bars are 50  $\mu$ m. A: adventitia, M: media layer, I: intima, L: lumen. Nuclei were stained with DAPI.



**Supplementary Figure S14. SMCs cannot proliferate after vascular injury.**

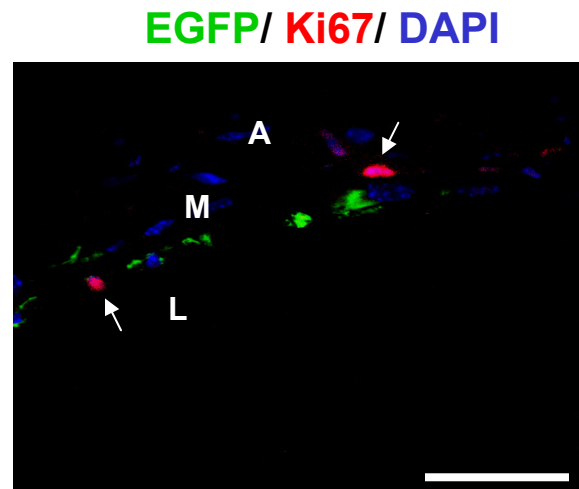

Staining of a cross-section of carotid artery of SM-MHC-Cre/LoxP-EGFP mouse at day 5 after injury with antibodies against EGFP (green) and ki67 (red). Nuclei were stained with DAPI. Arrows indicate proliferating non-SMCs. Scale bar is 50  $\mu$ m. L: Lumen. M: media layer. A: Adventitia.

**Supplementary Figure S15. Matrix synthesis by MVSCs in neointima.**

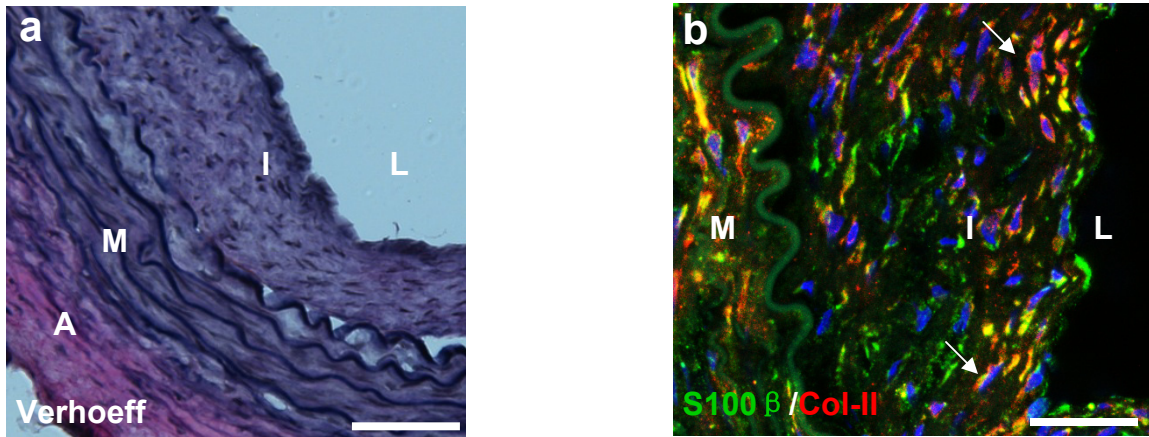

(a) A cross-section of carotid artery at 5 weeks after injury were subjected to Verhoeff's staining. (b) Immunostaining of a cross-section of injured carotid artery with antibodies against S100 $\beta$  (green) and collagen II (red). Arrows indicate cells expressing both S100 $\beta$  and collagen II. A: adventitia. M: media. I: intima. L: lumen. Scale bars are 50  $\mu$ m.

**Supplementary Figure S16. Multipotency of MVSCs isolated from human carotid arteries.**

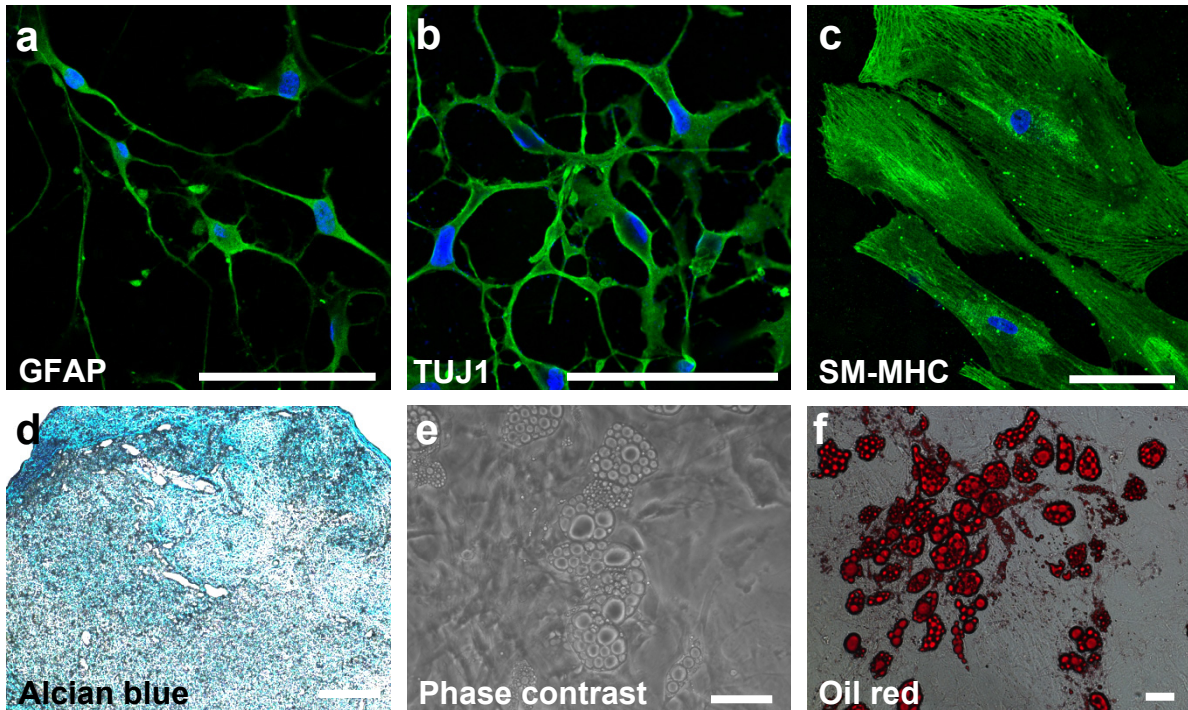

Human MVSCs derived Schwann cells were stained with an antibody against GFAP (a), neurons were stained with an antibody against TUJ1 (b), SMCs were stained with an antibody against SM-MHC (c), chondrocytes were stained for aggrecan by using alcian blue (d), phase contrast picture of oil drops (e), adipocytes were stained for oil droplets by using oil red staining (f). Scale bars are 100  $\mu$ m.

**Supplementary Table S1. The marker expression in MVSCs.**

| <b>Antibody</b> | <b>MVSC</b> | <b>Company</b> | <b>Dilution/Application</b> | <b>Catalog #</b> |
|-----------------|-------------|----------------|-----------------------------|------------------|
| SMA             | low         | Sigma          | 1: 400/IF                   | A2547            |
| CNN1            | -           | Epitomics      | 1:200/IF                    | 1806-1           |
| SM-22 $\alpha$  | low         | Abcam          | 1:100/IF                    | Ab14106          |
| NM-MHC          | +           | Abcam          | 1:100/IF                    | Ab684            |
| SM-MHC          | -           | Santa Cruz     | 1:50/IF                     | Sc-79079         |
| Myocardin       | -           | Santa Cruz     | 1:50/IF                     | Sc-34238         |
| Sox10           | +           | R&D            | 1:100/IF                    | MAB2864          |
| Slug            | -           | Santa Cruz     | 1:50/IF                     | Sc-166476        |
| Snail           | +           | Santa Cruz     | 1:50/IF                     | Sc-28199         |
| Pax-3/7         | +           | Santa Cruz     | 1:50/IF                     | Sc-25409         |
| Sox1            | +           | Chemicon       | 1:100/IF                    | AB15766          |
| Sox17           | +           | R&D            | 1:100/IF                    | MAB1924          |
| Nestin          | +           | Abcam          | 1:100/IF                    | ab5968           |
| AP-2 $\alpha$   | -           | DSHB           | 1:50/IF                     | 3b5              |
| AP-2 $\beta$    | -           | Santa Cruz     | 1:50/IF                     | sc-6310          |
| Vimentin        | +           | DAKO           | 1:100/IF                    | M0725            |
| Musashi         | -           | Chemicon       | 1:100/IF                    | AB5977           |
| p75             | -           | Abcam          | 1:100/IF and FC             | ab8874           |
| HNK1            | -           | Sigma          | 1:200/IF and FC             | C-6680           |
| NFM             | +           | Sigma          | 1:200/IF                    | N4142            |
| TUJ1            | -           | Chemicon       | 1:300/IF                    | MAB1637          |
| Peripherin      | +           | Chemicon       | 1:200/IF                    | AB1530           |
| Brn3a           | +           | Millipore      | 1:200/IF                    | AB5945           |
| Phox2b          | +           | Santa Cruz     | 1:50/IF                     | Sc-13224         |
| GFAP            | -           | Millipore      | 1:200/IF                    | AB5804           |

**Supplementary Table S1 (Continued)**

| <b>Antibody</b>            | <b>MVSC</b> | <b>Company</b> | <b>Dilution/Application</b> | <b>Catalog #</b> |
|----------------------------|-------------|----------------|-----------------------------|------------------|
| S100 $\beta$               | +           | Sigma          | 1:200/IF                    | S2532            |
| Oct4                       | -           | Santa Cruz     | 1:50/IF                     | Sc-5279          |
| Nanog                      | -           | Chemicon       | 1:100/IF                    | AB9220           |
| Sox2                       | -           | Millipore      | 1:100/IF                    | AB5603           |
| Pax6                       | -           | Covance        | 1:300/IF                    | PRB-278P         |
| O4                         | -           | Millipore      | 1:200/IF                    | MAB345           |
| CD44                       | +           | BD Phar        | 1:100/FC                    | 550974           |
| CD29                       | +           | BD Phar        | 1:100/FC                    | 555005           |
| CD146                      | -           | R&D            | 1:100/FC                    | FAB3250F         |
| PDX1                       | -           | Millipore      | 1:100/IF                    | AB3505           |
| AFP                        | -           | R&D            | 1:100/IF                    | MAB-1368         |
| CD133                      | -           | Abcam          | 1:100/IF                    | Ab19898          |
| CD31                       | -           | Chemicon       | 1:50/IF                     | MAB1393          |
| CD34                       | -           | Santa Cruz     | 1:50/IF                     | Sc-7045          |
| C-kit                      | -           | BD Phar        | 1:50/FC                     | 561680           |
| Flk-1                      | -           | BD Phar        | 1:50/FC                     | 561025           |
| Sca-1                      | -           | BD Phar        | 1:100/FC                    | 562059           |
| P63                        | -           | Abcam          | 1:100/IF                    | ab59691          |
| CK14                       | -           | Millipore      | 1:200/IF                    | MAB3232          |
| Alkaline phosphatase (ALP) | -           | DSHB           | 1:50/IF                     | B4-78            |
| Collagen II                | -           | Chemicon       | 1:100/IF                    | MAB8887          |
| Sox9                       | -           | Abcam          | 1:100/IF                    | ab3697           |
| CD14                       | -           | Santa Cruz     | 1:50/IF and FC              | Sc-1182          |



**Supplementary Table S2. Differentially expressed genes in MVSCs derived from carotid arteries and jugular veins. Expression levels and ratio were presented in log<sub>2</sub> scale. A: carotid artery-derived MVSCs. V: jugular vein-derived MVSCs.**

| Gene title                                                                              | A (average) | V (average) | Ratio(A/V) |
|-----------------------------------------------------------------------------------------|-------------|-------------|------------|
| lipoprotein lipase                                                                      | 8.031393    | 12.7333     | -4.7019    |
| dermatopontin                                                                           | 6.66412     | 10.91014    | -4.24373   |
| complement factor D (adipsin)                                                           | 6.968016    | 10.74751    | -3.7795    |
| secreted and transmembrane 1B                                                           | 6.980182    | 10.71332    | -3.73313   |
| leucine rich repeat containing 17                                                       | 6.780308    | 10.25873    | -3.47843   |
| placenta-specific 8                                                                     | 9.917507    | 13.37598    | -3.45847   |
| retinoic acid receptor responder (tazarotene induced) 2                                 | 9.282749    | 12.70668    | -3.42393   |
| T-box 15                                                                                | 6.942331    | 10.2196     | -3.27727   |
| ADP-ribosyltransferase 3                                                                | 6.982144    | 10.21136    | -3.22922   |
| olfactomedin 1                                                                          | 7.493702    | 10.6807     | -3.187     |
| proenkephalin                                                                           | 7.637622    | 10.78178    | -3.14416   |
| pleiomorphic adenoma gene-like 1                                                        | 7.130618    | 10.2124     | -3.08179   |
| chemokine (C-X-C motif) ligand 13                                                       | 10.07631    | 13.1315     | -3.05518   |
| carboxypeptidase X (M14 family), member 1                                               | 10.13501    | 13.18826    | -3.05326   |
| cellular retinoic acid binding protein 1                                                | 7.703065    | 10.73564    | -3.03258   |
| homeo box D9                                                                            | 6.473827    | 9.45664     | -2.98281   |
| complement component 2                                                                  | 6.333837    | 9.301748    | -2.96791   |
| thrombospondin 2                                                                        | 6.855276    | 9.751714    | -2.89644   |
| growth hormone receptor                                                                 | 7.287906    | 10.1836     | -2.89569   |
| BMP-binding endothelial regulator                                                       | 6.865798    | 9.729056    | -2.86326   |
| complement component 2                                                                  | 7.188658    | 9.979958    | -2.7913    |
| H19, imprinted maternally expressed transcript                                          | 6.517743    | 9.287932    | -2.77019   |
| UDP-N-acetyl-alpha-D-galactosamine:polypeptide N-acetylgalactosaminyltransferase-like 1 | 6.860742    | 9.560874    | -2.70013   |
| transforming growth factor, beta induced                                                | 6.978212    | 9.634068    | -2.65586   |
| hyaluronan synthase 2                                                                   | 6.977956    | 9.633457    | -2.6555    |
| Eyes absent homolog 2 (Drosophila)                                                      | 6.389388    | 9.037509    | -2.64812   |
| complement factor I                                                                     | 6.317993    | 8.954533    | -2.63654   |
| proprotein convertase subtilisin/kexin type 6                                           | 6.878133    | 9.419053    | -2.54092   |
| amine oxidase, copper containing 3 (vascular adhesion protein 1)                        | 9.070738    | 11.59163    | -2.5209    |
| chemokine (C-C motif) ligand 11                                                         | 9.043801    | 11.56433    | -2.52053   |
| LRRN4 C-terminal like                                                                   | 6.890534    | 9.349794    | -2.45926   |
| matrix metalloproteinase 12                                                             | 8.132424    | 10.57703    | -2.4446    |
| angiopoietin 4                                                                          | 6.820709    | 9.238427    | -2.41772   |
| quinolinate phosphoribosyltransferase                                                   | 8.164757    | 10.54528    | -2.38052   |
| complement component 4, gene 2 /// complement component 4B (Chido blood group)          | 9.732406    | 12.06506    | -2.33265   |

**Supplementary Table S2 (Continued)**

|                                                                                  |          |          |          |
|----------------------------------------------------------------------------------|----------|----------|----------|
| complement component 2                                                           | 7.120215 | 9.432509 | -2.31229 |
| adenosine A2B receptor                                                           | 9.371842 | 11.66264 | -2.2908  |
| transglutaminase 1, K polypeptide                                                | 6.639287 | 8.922598 | -2.28331 |
| solute carrier family 39 (zinc transporter), member 8                            | 6.470646 | 8.741465 | -2.27082 |
| matrix metalloproteinase 3                                                       | 9.572365 | 11.83371 | -2.26134 |
| secreted frizzled-related protein 4                                              | 10.09367 | 12.34915 | -2.25547 |
| wingless-type MMTV integration site family, member 4                             | 6.328639 | 8.543901 | -2.21526 |
| Hypothetical protein LOC689663                                                   | 7.251499 | 9.431611 | -2.18011 |
| lecithin-retinol acyltransferase (phosphatidylcholine-retinol-O-acyltransferase) | 8.20533  | 10.38089 | -2.17556 |
| early B-cell factor 3                                                            | 6.910186 | 9.078814 | -2.16863 |
| alpha-2u globulin PGCL4                                                          | 8.247121 | 10.36101 | -2.11389 |
| complement factor B                                                              | 9.624536 | 11.72206 | -2.09752 |
| tumor necrosis factor alpha induced protein 6                                    | 10.46488 | 12.55217 | -2.08729 |
| nidogen 2                                                                        | 10.66323 | 12.73784 | -2.07461 |
| sushi, nidogen and EGF-like domains 1                                            | 10.24981 | 12.32093 | -2.07112 |
| alpha-2u globulin PGCL4                                                          | 6.114782 | 8.185016 | -2.07023 |
| fibrillin 2                                                                      | 7.539471 | 9.609447 | -2.06998 |
| SH3-domain kinase binding protein 1                                              | 6.963905 | 9.010674 | -2.04677 |
| plexin domain containing 2                                                       | 7.615719 | 9.656075 | -2.04036 |
| poly(rC) binding protein 3                                                       | 6.611741 | 8.63729  | -2.02555 |
| von Willebrand factor A domain containing 1                                      | 6.261853 | 8.286512 | -2.02466 |
| aldo-keto reductase family 1, member C-like 1                                    | 8.786936 | 10.80652 | -2.01958 |
| hypothetical protein LOC688459                                                   | 8.919705 | 6.411005 | 2.5087   |
| WNK lysine deficient protein kinase 4                                            | 7.499638 | 4.985299 | 2.51434  |
| similar to integrin alpha 8                                                      | 10.09637 | 7.57154  | 2.524826 |
| flavin containing monooxygenase 2                                                | 8.22844  | 5.700068 | 2.528372 |
| family with sequence similarity 107, member B                                    | 7.984358 | 5.44916  | 2.535198 |
| transducin-like enhancer of split 1 (E(sp1) homolog, Drosophila)                 | 7.435926 | 4.871385 | 2.56454  |
| flavin containing monooxygenase 3                                                | 7.15284  | 4.580658 | 2.572181 |
| regulator of G-protein signaling 2                                               | 11.54102 | 8.963578 | 2.577443 |
| growth differentiation factor 10                                                 | 10.71561 | 8.088668 | 2.62694  |
| transforming growth factor alpha                                                 | 9.81371  | 7.167007 | 2.646703 |
| phospholipid scramblase 2                                                        | 9.492705 | 6.795921 | 2.696783 |
| MDS1 and EVI1 complex locus                                                      | 8.858904 | 6.157443 | 2.701462 |
| similar to integrin alpha 8                                                      | 9.392531 | 6.682334 | 2.710197 |
| collagen, type IV, alpha 5                                                       | 10.27227 | 7.555335 | 2.716931 |
| cyclin D2                                                                        | 10.99901 | 8.27241  | 2.726598 |
| gap junction protein, beta 2                                                     | 7.060222 | 4.330215 | 2.730008 |
| myosin light chain kinase                                                        | 10.94207 | 8.196665 | 2.745403 |
| serum deprivation response                                                       | 11.18922 | 8.433875 | 2.755343 |

**Supplementary Table S2 (Continued)**

|                                                                             |          |          |          |
|-----------------------------------------------------------------------------|----------|----------|----------|
| ankyrin repeat domain 1 (cardiac muscle)                                    | 7.766035 | 5.00664  | 2.759396 |
| odz, odd Oz/ten-m homolog 3 (Drosophila)                                    | 6.80937  | 4.040711 | 2.768659 |
| serum deprivation response                                                  | 10.21024 | 7.428725 | 2.781519 |
| cell adhesion molecule 1                                                    | 7.885473 | 5.097356 | 2.788117 |
| complement component 1, q subcomponent-like 3                               | 8.641059 | 5.841769 | 2.799289 |
| LOC363015                                                                   | 8.214709 | 5.400896 | 2.813812 |
| paired box 9                                                                | 7.752265 | 4.892829 | 2.859436 |
| acid phosphatase, prostate                                                  | 7.712842 | 4.848012 | 2.864829 |
| cytochrome P450, family 26, subfamily b, polypeptide 1                      | 10.17016 | 7.255595 | 2.914562 |
| ceruloplasmin                                                               | 13.19412 | 10.26331 | 2.930816 |
| phospholipid scramblase 1                                                   | 10.9648  | 7.997051 | 2.967751 |
| serglycin                                                                   | 10.91656 | 7.933558 | 2.983003 |
| chemokine (C-X3-C motif) ligand 1                                           | 9.427428 | 6.436873 | 2.990555 |
| similar to SMAD-interacting zinc finger protein 2                           | 6.987849 | 3.92835  | 3.059499 |
| laminin, alpha 5                                                            | 8.94223  | 5.877273 | 3.064957 |
| receptor (G protein-coupled) activity modifying protein 1                   | 8.368172 | 5.287092 | 3.08108  |
| transmembrane 4 L six family member 1                                       | 8.135064 | 5.048338 | 3.086727 |
| lipopolysaccharide binding protein                                          | 10.51802 | 7.413863 | 3.104157 |
| Cd200 molecule                                                              | 10.95231 | 7.758638 | 3.193671 |
| Forkhead box P2                                                             | 7.578067 | 4.365891 | 3.212176 |
| bone morphogenetic protein 2                                                | 9.452797 | 6.233906 | 3.218891 |
| S100 calcium binding protein G                                              | 7.427089 | 4.164898 | 3.262191 |
| transmembrane 4 L six family member 1                                       | 11.47979 | 8.214201 | 3.265586 |
| SRY (sex determining region Y)-box 17                                       | 8.001019 | 4.687529 | 3.31349  |
| complement component 1, q subcomponent-like 3                               | 8.136158 | 4.682555 | 3.453603 |
| bone morphogenetic protein 2                                                | 8.888307 | 5.428536 | 3.459771 |
| hairy/enhancer-of-split related with YRPW motif 2                           | 8.269008 | 4.752881 | 3.516127 |
| gap junction protein, alpha 5                                               | 12.03444 | 8.509872 | 3.524565 |
| gap junction protein, alpha 4                                               | 9.529695 | 5.969648 | 3.560048 |
| tumor protein D52-like 1                                                    | 7.462407 | 3.88732  | 3.575087 |
| inhibitor of DNA binding 4                                                  | 8.387406 | 4.809774 | 3.577632 |
| alcohol dehydrogenase 1 (class I)                                           | 8.255159 | 4.669793 | 3.585366 |
| bone morphogenetic protein 4                                                | 7.906448 | 4.306913 | 3.599534 |
| growth associated protein 43                                                | 8.628532 | 4.793128 | 3.835404 |
| growth arrest specific 6                                                    | 10.61567 | 6.65438  | 3.961289 |
| phospholamban                                                               | 9.051457 | 5.057065 | 3.994393 |
| protein tyrosine phosphatase, receptor type, D                              | 9.646863 | 5.333628 | 4.313235 |
| aldehyde dehydrogenase 1 family, member A3                                  | 10.00725 | 5.344812 | 4.662438 |
| solute carrier family 6 (neurotransmitter transporter, serotonin), member 4 | 9.344938 | 4.411995 | 4.932943 |

**Supplementary Table S3. Relative mRNA expression levels of MSC markers in MVSCs derived from carotid arteries and jugular veins. Expression levels were presented in log<sub>2</sub> scale. A: carotid artery-derived MVSCs. V: jugular vein-derived MVSCs.**

|              | A1       | A2       | A3       | V1       | V2       | V3       |
|--------------|----------|----------|----------|----------|----------|----------|
| <b>CD29</b>  | 12.68622 | 12.68937 | 12.56967 | 12.72439 | 12.76024 | 12.67875 |
| <b>CD54</b>  | 11.42541 | 11.04618 | 11.07476 | 10.75978 | 10.71997 | 10.85471 |
| <b>CD13</b>  | 12.58192 | 12.19374 | 12.55867 | 12.70696 | 12.85414 | 12.889   |
| <b>CD44</b>  | 10.17512 | 9.58491  | 9.86529  | 9.339053 | 9.576896 | 9.890446 |
| <b>CD73</b>  | 8.407454 | 8.193264 | 8.438201 | 7.98988  | 8.023622 | 8.219538 |
| <b>CD90</b>  | 9.909732 | 10.10694 | 9.659861 | 10.56263 | 10.51612 | 10.21175 |
| <b>CD105</b> | 9.780092 | 9.635467 | 9.681691 | 9.041794 | 9.229681 | 9.735992 |
| <b>CD166</b> | 11.60239 | 11.50017 | 11.35184 | 10.81729 | 11.13338 | 11.22315 |
| <b>CD106</b> | 12.3402  | 12.69535 | 13.03897 | 11.53258 | 10.66766 | 11.01302 |

**Supplementary Table S4. Primer sequences used for genotyping.**

| <b>Transgene</b>         | <b>Forward</b>             | <b>Reverse</b>            |
|--------------------------|----------------------------|---------------------------|
| Wnt1-Cre                 | GCAATTTTCGGCTATACGTAACAGGG | GCAAGAACCTGATGGACATGTTCAG |
| SM-MHC-Cre               | GCGGTCTGGCAGTAAAACTATC     | GTGAAACAGCATTGCTGTCACTT   |
| Rosa26-loxP-lacZ         | AAAGTCGCTCTGAGTTGTTAT      | GCGAAGAGTTTGTCTCAACC      |
| Rosa26-loxP-EGFP         | GAGTTCTCTGCTGCCTCCTG       | AAGACCGCGAAGAGTTTGTC      |
| $\beta$ -actin-LoxP-EGFP | AAGTTCATCTGCACCACCG        | TCCTTGAAGAAGATGGTGCG      |



**Supplementary Table S5. Primer sequences used in qPCR.**

| <b>Gene</b>  | <b>Forward</b>               | <b>Reverse</b>            |
|--------------|------------------------------|---------------------------|
| Rat Sox10    | CTGGAGGTTGCTGAACGAGAGT       | GTCCGGATGGTCTTTTTTTGTG    |
| Rat Sox17    | AGAACCCGGATCTGCACAAC         | AGGATTTGCCTAGCATCTTGCT    |
| Rat Aggrecan | CTTCAAGCTGAACTATGACCACTTTACT | CATGGTCTGGAACCTTCTTCTGAGA |
| Rat SMA      | TCCTGACCCTGAAGTATCCGATA      | GGTGCCAGATCTTTTCCATGTC    |
| Rat CNN1     | AGAACAAGCTGGCCCAGAAA         | CACCCCTTCGATCCACTCTCT     |
| Rat 18S      | GCCGCTAGAGGTGAAATTCTTG       | CATTCTTGGCAAATGCTTTTCG    |
